# Supplementary material
Source: HighWire-hosted journal article supplement (https://jnm.snmjournals.org/highwire/filestream/94615/field_highwire_adjunct_files/0/130716_Supplemental_Data.pdf)
Supplement: 130716_Supplemental_Data.pdf [file 130716_Supplemental_Data.pdf]

Supplemental Table 1. Different Regions of Occult Lymph Node Metastasis According to the Location of Primary Tumor

| Tumor Location   | Region of Occult Lymph Node Metastasis |            |           |           |            | n  |
|------------------|----------------------------------------|------------|-----------|-----------|------------|----|
|                  | Cervical                               | Um         | Mm        | Lm        | Abd        |    |
| Ut               | 1 (14.3%)                              | 5 (71.4%)  | 0 ( 0.0%) | 0 ( 0.0%) | 1 (14.3%)  | 7  |
| Mt               | 0 ( 0.0%)                              | 21 (46.7%) | 5 (11.1%) | 0 ( 0.0%) | 19 (42.2%) | 45 |
| Lt & EG junction | 0 ( 0.0%)                              | 12 (28.6%) | 6 (14.3%) | 3 ( 7.1%) | 21 (50.0%) | 42 |

Um = Upper mediastinal, Mm = Middle mediastinal, Lm = Lower mediastinal, Abd = Abdominal, n = Number of occult lymph node metastasis, Ut = Upper thoracic, Mt = Middle thoracic, Lt = Lower thoracic, EG = Esophagogastric.
